# Supplementary material
Source: MDPI journal article supplement (https://www.mdpi.com/2227-9040/10/2/70)
Supplement: s1 [file s1 › chemosensors-1553972-supplementary.pdf]

## Supporting Information

# QCM-Based HCl Gas Detection on Dimethylamine-Functionalized Crosslinked Copolymer Films

Jinchul Yang <sup>1,2</sup> and Jinyoung Park <sup>1,2,\*</sup>

<sup>1</sup> School of Applied Chemical Engineering, Kyungpook National University,  
80 Daehak-ro, Buk-gu, Daegu 41566, Korea; whdns861223@knu.ac.kr

<sup>2</sup> Department of Polymer Science & Engineering, Kyungpook National University,  
80 Daehak-ro, Buk-gu, Daegu 41566, Korea

\* Correspondence: jinpark@knu.ac.kr; Tel.: +82-53-950-5624

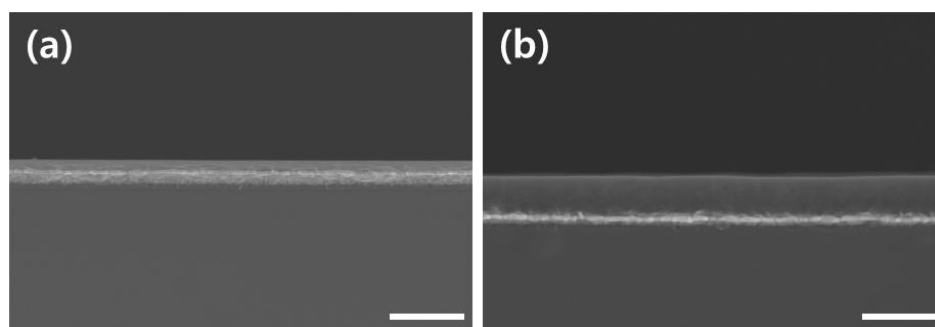

**Figure S1.** Cross-sectional scanning electron microscopy (SEM) images of poly(DMAEMA-co-EGDMA) films with mass of (a) 1.7  $\mu\text{g}$  and (b) 11.8  $\mu\text{g}$ , respectively. All scale bars are 1  $\mu\text{m}$ .

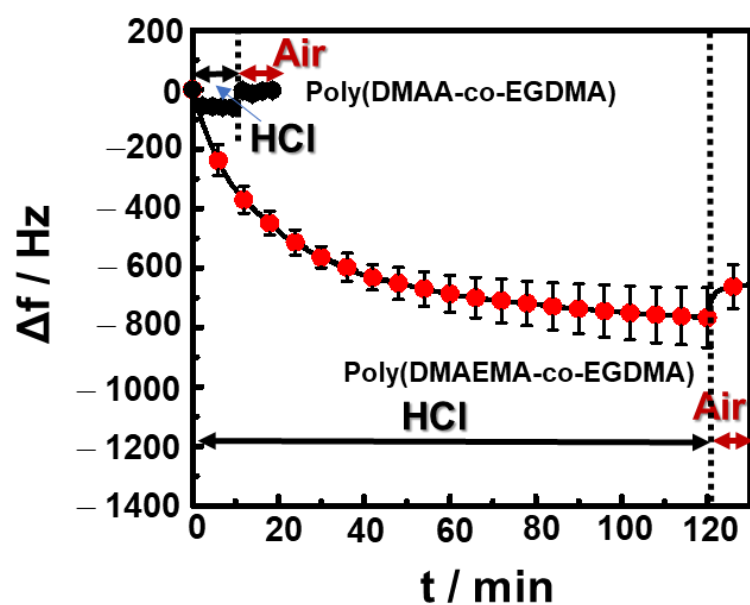

**Figure S2.** Resonant frequency change ( $\Delta f$ ) as a function of time for poly(DMAEMA-co-EGDMA) and poly(DMAA-co-EGDMA) films in 70-ppm HCl and synthetic air flow at 22°C (10% RH). The adsorption-desorption process was performed until the signal stabilized.

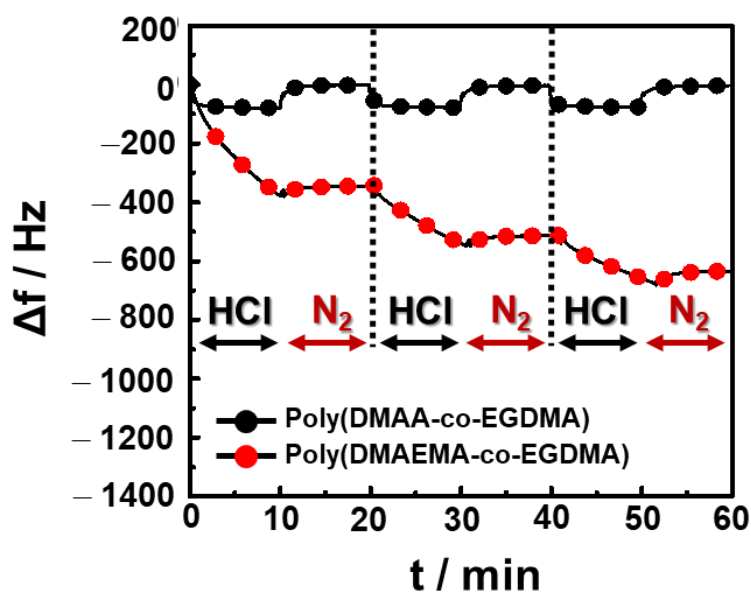

**Figure S3.** Resonant frequency change ( $\Delta f$ ) as a function of time for poly(DMAEMA-co-EGDMA) and poly(DMAA-co-EGDMA) films in 100-ppm HCl and  $N_2$  flow at 22°C (10% RH). Three cycles adsorption-desorption process was performed.

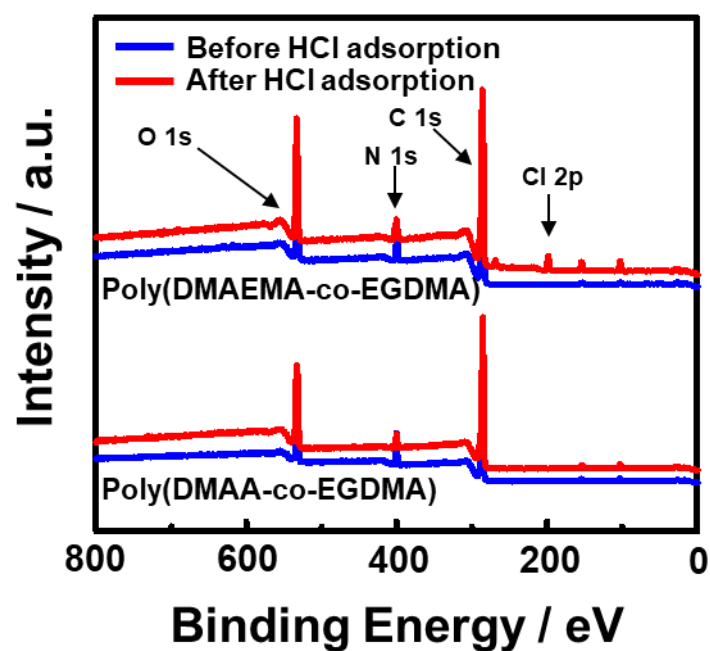

**Figure S4.** XPS wide scan spectra for poly(DMAEMA-co-EGDMA) and poly(DMAA-co-EGDMA) films before and after HCl adsorption.

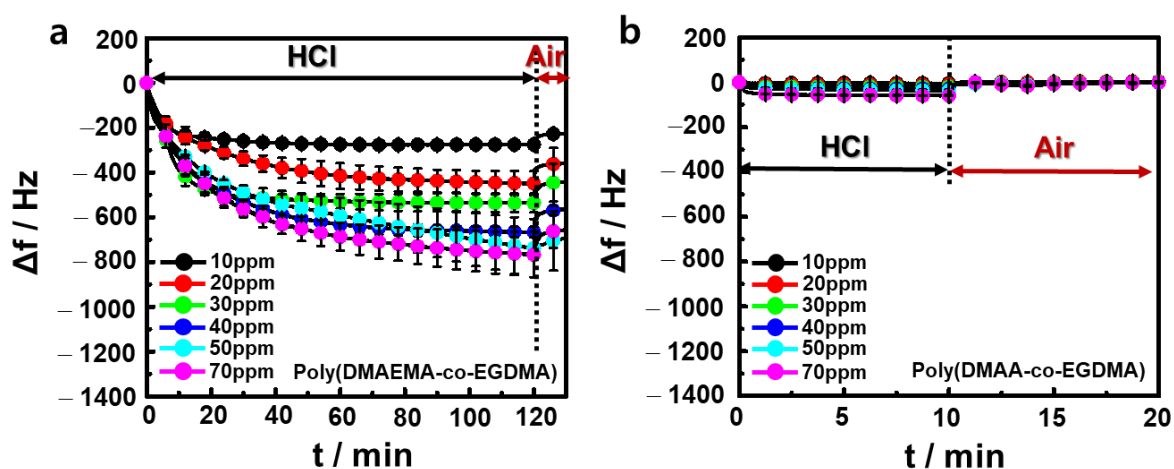

**Figure S5.** Resonant frequency change ( $\Delta f$ ) as a function of time for (a) poly(DMAEMA-co-EGDMA) and (b) poly(DMAA-co-EGDMA) films in HCl gas flow ranging from 10 to 70 ppm at 22 °C and 10% RH during the adsorption process. Synthetic air was used for desorption, and the desorption process was performed until the signal stabilized.

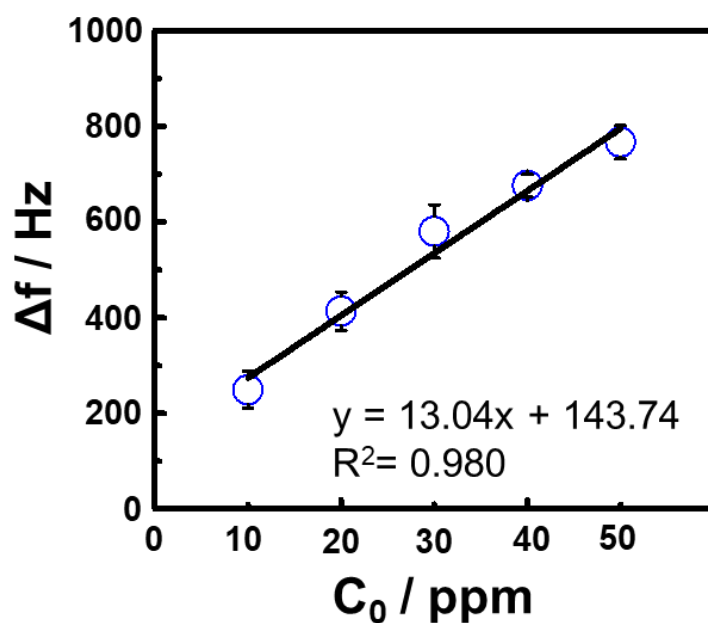

**Figure S6.** Linear regression curve of poly(DMAEMA-co-EGDMA) for resonant frequency change ( $\Delta f$ ) as a function of HCl concentration in HCl ranging from 10 to 50 ppm.

**Table S1.** Comparison of HCl on various sensor configurations, including the sensitivity and limit of detection in a linear range

| Sensor Configuration                                       | Sensitivity | LOD <sup>a</sup> | Reference |
|------------------------------------------------------------|-------------|------------------|-----------|
| PDMAA <sup>b</sup> film                                    | 4 Hz/ppm    | 2.5 ppm          | 1         |
| PNIPAM <sup>c</sup> nanoparticle                           | 3.8 Hz/ppm  | -                | 2         |
| PNIPAM nanoparticle                                        | 3.3 Hz/ppm  | -                | 3         |
| Aminated polystyrene particles                             | 3.88 Hz/ppm | 5 ppm            | 4         |
| Morpholine-functional styrene based copolymer <sup>d</sup> | 10 Hz/ppm   | -                | 5         |
| This work                                                  | 13 Hz/ppm   | 0.55 ppm         | -         |

<sup>a</sup> Limit of detection. <sup>b</sup> Poly(N,N-dimethylacrylamide) <sup>c</sup> Poly(N-isopropylacrylamide) <sup>d</sup> Morpholine-functional styrene-co-chloromethylstyrene copolymer

**Table S2.** Fitting parameters of the Langmuir and Freundlich models for the adsorption of HCl gas on two crosslinked films.

| Samples | Langmuir          |                   |       | Freundlich                             |         |       |
|---------|-------------------|-------------------|-------|----------------------------------------|---------|-------|
|         | $k_L^a$<br>(L/mg) | $Q_m^b$<br>(mg/g) | $R^2$ | $k_F^c$<br>(mg/g)(L/mg) <sup>1/n</sup> | $1/n^d$ | $R^2$ |
| C3-DMA  | 17.1              | 252.4             | 0.996 | 521.5                                  | 0.52    | 0.976 |
| C0-DMA  | 9.6E-4            | 89627.8           | 0.890 | 85.7                                   | 1       | 0.890 |

<sup>a</sup> Langmuir adsorption equilibrium constant. <sup>b</sup> maximum adsorption capacity. <sup>c</sup> Freundlich adsorption equilibrium constant. <sup>d</sup> heterogeneity factor;  $R^2$  correlation coefficient.

- [1] Matsuguchi, M.; Kadowaki, Y. Poly(acrylamide) derivatives for QCM-based HCl gas sensor applications. *Sens. Actuators B Chem.* **2008**, *130*, 842–847.
- [2] Matsuguchi, M.; Harada, N.; Omori, S. Poly(N-isopropylacrylamide) nanoparticles for QCM-based gas sensing of HCl. *Sens. Actuators B Chem.* **2014**, *190*, 446–450.
- [3] Matsuguchi, M.; Fujii, S. HCl gas sensor coating based on poly (N-isopropylacrylamide) nanoparticles prepared from water-methanol binary solvent. *Sensors* **2018**, *18*, 3283.
- [4] Jin, Y.-J.; Park, J. QCM-based HCl gas sensors using spin-coated aminated polystyrene colloids. *Polymers* **2020**, *12*, 1591.
- [5] Matsuguchi, M.; Kadowaki, Y.; Noda, K.; Naganawa, R. HCl gas monitoring based on a QCM using mor-pho-line-functional styrene-co-chloromethylstyrene copolymer coatings. *Sens. Actuators B Chem.* **2007**, *120*, 462–466.
